# Supplementary material for: Rapid Fermentable Substance Modulates Interactions between Ruminal Commensals and Toll-Like Receptors in Promotion of Immune Tolerance of Goat Rumen
Source: PubMed Central journal article supplement (PMC5112275; doi:10.3389/fmicb.2016.01812), 2016-11-17
Supplement: Table_2.pdf [file Table_2.pdf]

Table S2 Quantitative PCR primers used in this study

| Genes                          | Reference/Accession Nr.  | Forward (5'>3')        | Reverse (5'>3')       |
|--------------------------------|--------------------------|------------------------|-----------------------|
| <i>GAPDH</i>                   | Yan <i>et al.</i> , 2014 | TTGTCTCCTGCGACTTCA     | CCACCACCCTGTTACTGTT   |
| <i>TLR1</i>                    | NM_001285605.1           | ACAATCCATTCCAATGTTCC   | ACAATGGTGACAATCAGCAG  |
| <i>TLR2</i>                    | XM_013970466.1           | CTGTGTGCGTCTTCCTCAGA   | TCAGGGAGCAGAGTAACCAGA |
| <i>TLR4</i>                    | NM_001285574.1           | GGTTTCCACAAAAGCCGTAA   | AGGACGATGAAGATGATGCC  |
| <i>TLR5</i>                    | NM_001285699.1           | ACCTGGGTGGAAGTCAGATA   | GGTTGAGGGAAAAATCAATG  |
| <i>TLR6</i>                    | NM_001285540.1           | AGGCCAAGTATCAAGAGACG   | AGAGGACAGTCACAGCAACA  |
| <i>TLR10</i>                   | NM_001285541.1           | TTGCATGATGGAATCAAAAC   | AACCAATTGGAAGATGAGGA  |
| MyD88                          | XM_013973392.1           | ACAAGCCAATGAAGAAAGAG   | GAGGCGAGTCCAGAACC     |
| <i>IFN-<math>\gamma</math></i> | NM_001285682.1           | TGATTCAAATTCGGTGGAT    | GCAGGCAGGAGAACCATTAC  |
| <i>IL-1<math>\beta</math></i>  | XM_013967700.1           | CATGTGTGCTGAAGGCTCTC   | AGTGTCGGCGTATCACCTTT  |
| <i>IL-6</i>                    | NM_001285640.1           | CCAATCTGGGTTCAATCAGG   | ACCCACTCGTTTGAGGACTG  |
| <i>IL-10</i>                   | XM_005690416.2           | TTAAGGGTTACCTGGGTTGC   | CCCTCTCTTGAGCATATTGA  |
| <i>NHE1</i>                    | Yan <i>et al.</i> , 2014 | CCTCTACAGCTACATGGCCTAC | GGGAGATGTTGGCTTCCA    |
| <i>NHE2</i>                    | Yan <i>et al.</i> , 2014 | TTGGAGAGTCCCTGCTGAAC   | GGCCGTGATGTAGGACAAAT  |
| <i>NHE3</i>                    | Yan <i>et al.</i> , 2014 | AGCTACGTGGCCGAGGG      | AGACAGAGGCCTCCACGGT   |

| Genes                                      | Reference/Accession Nr.  | Forward (5'>3')           | Reverse (5'>3')          |
|--------------------------------------------|--------------------------|---------------------------|--------------------------|
| <i>Na<sup>+</sup>/K<sup>+</sup> ATPase</i> | Yan <i>et al.</i> , 2014 | TGAGCATCCCAGTGTTGT        | CCTTGTCAGATACTTCCT       |
| <i>vH ATPase</i>                           | Yan <i>et al.</i> , 2014 | TTTTATTGAACAAGAAGCCAATGA  | GATTCATCAAATTGGACATCTGAA |
| <i>PAT1</i>                                | Yan <i>et al.</i> , 2014 | CCTTGAGGCACGGCTAC         | GCACCAGACTCCGAGACATA     |
| <i>AE2</i>                                 | Yan <i>et al.</i> , 2014 | AGCAGCAACAACCTGGAGT       | GGTGAAACGGGAGACGAA       |
| <i>DRA</i>                                 | Yan <i>et al.</i> , 2014 | TTTAAAGTCCTAGAGTCCGTA     | CGCTGATTTATTTCTTTAACCAC  |
| <i>MCT1</i>                                | Yan <i>et al.</i> , 2014 | ACCAGTTTTAGGTCGTCTCA      | GGCTTCTCAGCAACATCTACA    |
| <i>MCT4</i>                                | Yan <i>et al.</i> , 2014 | GTTTGGGATAGGCTACAGTGACACA | GCAGCCAAAGCGATTCA        |
