# Supplementary material for: Rapid Fermentable Substance Modulates Interactions between Ruminal Commensals and Toll-Like Receptors in Promotion of Immune Tolerance of Goat Rumen
Source: PubMed Central journal article supplement (PMC5112275; doi:10.3389/fmicb.2016.01812), 2016-11-17
Supplement: Table_3.pdf [file Table_3.pdf]

Table S3. Rumen microbial compositions of MNFC and LNFC groups (mean value  $\pm$  SE; n = 3).

| Item | Genus                  | MNFC $\pm$ SE    | LNFC $\pm$ SE    |
|------|------------------------|------------------|------------------|
| 1    | Prevotella             | 38531 $\pm$ 5348 | 40653 $\pm$ 1013 |
| 2    | p:Bacteroidetes        | 8629 $\pm$ 2112  | 5412 $\pm$ 1241  |
| 3    | o:Bacteroidales        | 8214 $\pm$ 414   | 30450 $\pm$ 4418 |
| 4    | f:Prevotellaceae       | 5333 $\pm$ 929   | 2446 $\pm$ 169   |
| 5    | Paraprevotella         | 5238 $\pm$ 2073  | 896 $\pm$ 126    |
| 6    | Subdivision5_genera_IS | 4423 $\pm$ 458   | 1086 $\pm$ 673   |
| 7    | f:Lachnospiraceae      | 3980 $\pm$ 256   | 950 $\pm$ 169    |
| 8    | f:Ruminococcaceae      | 3341 $\pm$ 611   | 3140 $\pm$ 157   |
| 9    | f:Synergistaceae       | 3270 $\pm$ 2171  | 42 $\pm$ 33      |
| 10   | f:Porphyromonadaceae   | 2973 $\pm$ 1155  | 1378 $\pm$ 209   |
| 11   | f:Veillonellaceae      | 2453 $\pm$ 1439  | 4473 $\pm$ 212   |
| 12   | Unclassified_Bacteria  | 1808 $\pm$ 815   | 1359 $\pm$ 218   |
| 13   | Paludibacter           | 1686 $\pm$ 767   | 0                |
| 14   | Barnesiella            | 1346 $\pm$ 655   | 260 $\pm$ 17     |
| 15   | o:Clostridiales        | 1138 $\pm$ 262   | 1589 $\pm$ 223   |
| 16   | Vampirovibrio          | 927 $\pm$ 482    | 343 $\pm$ 45     |
| 17   | Victivallis            | 784 $\pm$ 204    | 246 $\pm$ 138    |
| 18   | Treponema              | 707 $\pm$ 463    | 787 $\pm$ 132    |
| 19   | p:Firmicutes           | 700 $\pm$ 297    | 652 $\pm$ 375    |
| 20   | Ruminococcus           | 414 $\pm$ 23     | 152 $\pm$ 13     |
| 21   | Oscillibacter          | 405 $\pm$ 111    | 6 $\pm$ 5        |
| 22   | c:Lentisphaeria        | 401 $\pm$ 116    | 69 $\pm$ 21      |
| 23   | Clostridium_IV         | 340 $\pm$ 148    | 47 $\pm$ 7       |
| 24   | o:Selenomonadales      | 323 $\pm$ 139    | 21 $\pm$ 22      |
| 25   | Lachnospiracea_IS      | 310 $\pm$ 36     | 1018 $\pm$ 15    |
| 26   | Butyrivibrio           | 255 $\pm$ 79     | 176 $\pm$ 56     |
| 27   | TM7_genera_IS          | 242 $\pm$ 57     | 309 $\pm$ 87     |
| 28   | Synergistes            | 185 $\pm$ 89     | 25 $\pm$ 24      |
| 29   | Anaerovibrio           | 118 $\pm$ 36     | 14 $\pm$ 6       |
| 30   | Salinicoccus           | 112 $\pm$ 67     | 0                |
| 31   | SR1_genera_IS          | 92 $\pm$ 55      | 114 $\pm$ 48     |
| 32   | Hallella               | 91 $\pm$ 88      | 19 $\pm$ 20      |
| 33   | Anaeroplasma           | 90 $\pm$ 28      | 324 $\pm$ 78     |
| 34   | Acetivibrio            | 87 $\pm$ 28      | 213 $\pm$ 54     |
| 35   | c:Alphaproteobacteria  | 86 $\pm$ 37      | 516 $\pm$ 154    |
| 36   | p:Proteobacteria       | 83 $\pm$ 44      | 83 $\pm$ 43      |
| 37   | Elusimicrobium         | 74 $\pm$ 31      | 0                |
| 38   | Anaerovorax            | 57 $\pm$ 29      | 47 $\pm$ 19      |
| 39   | Succinielasticum       | 55 $\pm$ 41      | 16 $\pm$ 10      |
| 40   | Sporobacter            | 51 $\pm$ 10      | 14 $\pm$ 12      |
| 41   | Schwartzia             | 45 $\pm$ 18      | 17 $\pm$ 3       |
| 42   | Fibrobacter            | 43 $\pm$ 29      | 123 $\pm$ 30     |

|    |                         |       |       |
|----|-------------------------|-------|-------|
| 43 | c:Epsilonproteobacteria | 37±23 | 2±4   |
| 44 | Pseudobutyrvibrio       | 34±16 | 21±3  |
| 45 | Actinomyces             | 33±21 | 0     |
| 46 | Coprococcus             | 31±14 | 4±4   |
| 47 | Guggenheimella          | 30±22 | 0     |
| 48 | Blautia                 | 26±5  | 0     |
| 49 | Succinivibrio           | 25±9  | 95±41 |
| 50 | f:Enterobacteriaceae    | 24±7  | 18±10 |
| 51 | Slackia                 | 24±25 | 4±5   |
| 52 | o:Actinomycetales       | 23±7  | 0     |
| 53 | f:Coriobacteriaceae     | 19±17 | 5±4   |
| 54 | f:Erysipelotrichaceae   | 17±7  | 27±12 |
| 55 | f:Clostridiales_IS_XI   | 16±14 | 0     |
| 56 | Saccharofermentans      | 15±4  | 3±5   |
| 57 | Nocardioides            | 15±25 | 0     |
| 58 | Petrimonas              | 14±12 | 0     |
| 59 | c:Deltaproteobacteria   | 12±11 | 13±5  |
| 60 | Roseburia               | 11±5  | 0     |
| 61 | Dongia                  | 11±18 | 0     |
| 62 | Cerasiococcus           | 10±10 | 4±7   |
| 63 | Howardella              | 10±9  | 1±2   |
| 64 | Virgibacillus           | 9±8   | 0     |
| 65 | Spirochaeta             | 8±14  | 1±2   |
| 66 | Mogibacterium           | 8±7   | 0     |
| 67 | f:Xanthomonadaceae      | 8±14  | 0     |
| 68 | Selenomonas             | 7±8   | 1±2   |
| 69 | Propionibacterium       | 7±8   | 0     |
| 70 | f:Bacillaceae           | 7±8   | 0     |
| 71 | c:Clostridia            | 6±11  | 8±8   |
| 72 | Proteiniphilum          | 6±6   | 0     |
| 73 | Solobacterium           | 6±6   | 0     |
| 74 | Gp1                     | 4±7   | 0     |
| 75 | c:Actinobacteria        | 4±7   | 0     |
| 76 | o:Sphingobacteriales    | 4±6   | 0     |
| 77 | Clostridium_XIVa        | 4±6   | 0     |
| 78 | Gemmatimonas            | 4±7   | 0     |
| 79 | Caulobacter             | 4±8   | 0     |
| 80 | f:Comamonadaceae        | 4±8   | 0     |
| 81 | f:Oxalobacteraceae      | 4±8   | 0     |
| 82 | Yaniella                | 2±3   | 8±1   |
| 83 | Streptococcus           | 2±3   | 5±5   |
| 84 | o:Acidimicrobiales      | 2±3   | 1±2   |
| 85 | Desulfobulbus           | 2±3   | 1±2   |
| 86 | Gp3                     | 2±3   | 0     |

|     |                       |     |        |
|-----|-----------------------|-----|--------|
| 87  | Gp4                   | 2±3 | 0      |
| 88  | Actinospica           | 2±3 | 0      |
| 89  | Atopobium             | 2±3 | 0      |
| 90  | Armatimonadetes_gp2   | 2±3 | 0      |
| 91  | Armatimonadetes_gp4   | 2±3 | 0      |
| 92  | Flavisolibacter       | 2±3 | 0      |
| 93  | o:Ktedonobacterales   | 2±3 | 0      |
| 94  | Sphaerobacter         | 2±3 | 0      |
| 95  | p:Chloroflexi         | 2±3 | 0      |
| 96  | Chlorophyta           | 2±3 | 0      |
| 97  | Bacillus              | 2±3 | 0      |
| 98  | Tissierella           | 2±3 | 0      |
| 99  | Acetanaerobacterium   | 2±3 | 0      |
| 100 | Nitrospira            | 2±3 | 0      |
| 101 | Gemmata               | 2±3 | 0      |
| 102 | o:Rhodospirillales    | 2±3 | 0      |
| 103 | Massilia              | 2±3 | 0      |
| 104 | f:Sutterellaceae      | 2±3 | 0      |
| 105 | Ruminobacter          | 2±3 | 0      |
| 106 | Moraxella             | 2±3 | 0      |
| 107 | Pseudomonas           | 2±3 | 0      |
| 108 | Desulfovibrio         | 0   | 130±18 |
| 109 | Olsenella             | 0   | 70±23  |
| 110 | f:Anaerolineaceae     | 0   | 31±28  |
| 111 | Syntrophococcus       | 0   | 16±2   |
| 112 | Rikenella             | 0   | 15±6   |
| 113 | Escherichia/Shigella  | 0   | 6±5    |
| 114 | Oribacterium          | 0   | 5±9    |
| 115 | Bilophila             | 0   | 5±5    |
| 116 | Eubacterium           | 0   | 4±4    |
| 117 | f:Desulfovibrionaceae | 0   | 4±4    |
| 118 | WS3_genera_IS         | 0   | 4±5    |
| 119 | Rothia                | 0   | 1±2    |
| 120 | Enterorhabdus         | 0   | 1±2    |
| 121 | Pusillimonas          | 0   | 1±2    |

Counts were normalized to the relative abundance of each sample and showed here in a scale of 1/100,000; genera were sorted based on their relative abundance in the rumen microbial community in a descending order; f = Family; o = Order; c = Class; p = Phylum.
